# Supplementary material for: Investigation of the Effects of Heavy Metal Pollution on Surface Waters Before and During the COVID-19 Lockdown Periods in Bursa, Turkey
Source: Research Square preprint supplement (doi:10.21203/rs.3.rs-1443236/v1), 2022-03-17
Supplement: Supplementary file 1 [file f6403e2124e307901619b1db.docx]

**Investigation of the Effects of Heavy Metal Pollution on Surface Waters Before and During the COVID-19 Lockdown Periods in Bursa, Turkey**

Mehmet Ferhat Sari*, Fatma Esen

Department of Environmental Engineering, Faculty of Engineering, Bursa Uludag University 16059 Nilüfer/Bursa – Turkey

*Corresponding author: [511904004](mailto:payan@uludag.edu.tr)@ogr.uludag.edu.tr

Telephone Number: +90 (224) 294 20 28

**Supporting Information**

**Content**

**Table S1.** I, S,and MACvalues (mg/L)

**Table S2.** The total ILCRingestion values for adults before the COVID-19 lockdown

**Table S3.** The total ILCRingestion values for adults during the COVID-19 lockdown period

**Table S4.** The total ILCRdermal values for adults before the COVID-19 lockdown period

**Table S5.** The total ILCRdermal values for adults during the COVID-19 lockdown period

**Table S6.** The total ILCRingestion values for children before the COVID-19 lockdown

**Table S7.** The total ILCRingestion values for children during the COVID-19 lockdown period

**Table S8.** The total ILCRdermal values for children before the COVID-19 lockdown period

**Table S9.** The total ILCRdermal values for children during the COVID-19 lockdown period

**Table S10.** The total HI values for adults before the COVID-19 lockdown period

**Table S11.** The total HI values for adults during the COVID-19 lockdown period

**Table S12.** The total HI values for children before the COVID-19 lockdown period

**Table S13.** The total HI values for children during the COVID-19 lockdown period

**Table S1.** I, S,and MACvalues (mg/L)

|  | Fe* | Mn* | Cu* | Al*** | Cr** | Ni* | Zn* |
| --- | --- | --- | --- | --- | --- | --- | --- |
| Ideal values for heavy metals (mg/L)  (I) | 0.2 | 0.1 | 2 | 0.03 | 0.05 | 0.07 | 5 |
| Standard values for heavy metals (mg/L)  (S) | 0.3 | 0.4 | 1 | 0.2 | 0.1 | 0.02 | 3 |
| Maximum permissible concentration of the heavy metals  (MAC) (mg/L) | 0.3 | 0.4 | 2 | 0.005 | 0.05 | 0.07 | 3 |

*****Ustaoğlu and Aydın, (2020)

** Rezaei et al. (2019)

*** Kumar et al. (2019)

**Table S2.** The total ILCRingestion values for adults before the COVID-19 lockdown

|  | Fe | Mn | Cu | Al | Cr | Ni | Zn | ILCRingestion |
| --- | --- | --- | --- | --- | --- | --- | --- | --- |
| S1 | 1.24E-01 | 5.66E-03 | 2.40E-04 | 1.79E-01 | 2.40E-04 | 7.67E-04 | 8.63E-04 | 3.10E-01 |
| S2 | 4.66E-02 | 2.59E-03 | 2.40E-04 | 6.33E-02 | 2.40E-04 | 2.40E-04 | 8.15E-04 | 1.14E-01 |
| S3 | 2.41E-02 | 3.16E-03 | 2.40E-04 | 3.74E-02 | 2.40E-04 | 2.40E-04 | 6.71E-04 | 6.60E-02 |
| S4 | 4.41E-03 | 2.40E-04 | 2.40E-04 | 5.18E-03 | 2.40E-04 | 5.99E-04 | 2.40E-04 | 1.11E-02 |
| S5 | 1.53E-03 | 2.40E-04 | 2.40E-04 | 1.63E-03 | 2.40E-04 | 5.99E-04 | 2.40E-04 | 4.72E-03 |
| S6 | 3.60E-02 | 4.84E-03 | 2.40E-04 | 3.13E-02 | 1.05E-03 | 8.15E-04 | 6.76E-03 | 8.09E-02 |
| S7 | 1.75E-02 | 1.97E-03 | 2.40E-04 | 1.63E-02 | 9.11E-04 | 2.40E-04 | 8.20E-03 | 4.54E-02 |
| S8 | 1.57E-02 | 4.03E-03 | 2.40E-04 | 1.38E-02 | 6.71E-04 | 5.99E-04 | 5.13E-03 | 4.02E-02 |
| S9 | 7.05E-03 | 3.64E-03 | 2.40E-04 | 5.80E-03 | 5.75E-04 | 1.87E-03 | 4.70E-03 | 2.39E-02 |
| S10 | 1.91E-02 | 7.34E-03 | 9.11E-04 | 2.11E-02 | 7.67E-04 | 1.44E-03 | 3.26E-03 | 5.39E-02 |
| S11 | 6.05E-02 | 1.18E-02 | 2.40E-04 | 4.66E-02 | 2.78E-03 | 9.30E-03 | 6.27E-02 | 1.94E-01 |
| S12 | 2.24E-01 | 1.74E-02 | 5.75E-04 | 2.59E-01 | 1.63E-03 | 3.36E-03 | 1.06E-02 | 5.17E-01 |
| S13 | 3.53E-02 | 1.15E-02 | 2.40E-04 | 3.64E-02 | 5.56E-03 | 1.01E-03 | 1.63E-03 | 9.17E-02 |
| S14 | 2.25E-02 | 5.27E-03 | 2.40E-04 | 3.41E-02 | 2.40E-04 | 8.63E-04 | 5.75E-04 | 6.38E-02 |

**Table S3.** The total ILCRingestion values for adults during the COVID-19 lockdown period

|  | Fe | Mn | Cu | Al | Cr | Ni | Zn | ILCRingestion |
| --- | --- | --- | --- | --- | --- | --- | --- | --- |
| S1 | 4.17E-03 | 9.59E-04 | 2.40E-04 | 5.23E-03 | 2.40E-04 | 2.40E-04 | 2.40E-04 | 1.13E-02 |
| S2 | 8.49E-03 | 3.21E-03 | 2.40E-04 | 1.09E-02 | 2.40E-04 | 2.40E-04 | 2.40E-04 | 2.35E-02 |
| S3 | 2.41E-02 | 3.16E-03 | 2.40E-04 | 3.74E-02 | 2.40E-04 | 2.40E-04 | 6.71E-04 | 6.60E-02 |
| S4 | 3.01E-02 | 1.39E-03 | 2.40E-04 | 3.52E-02 | 2.40E-04 | 2.40E-04 | 2.40E-04 | 6.77E-02 |
| S5 | 3.75E-02 | 1.34E-03 | 2.40E-04 | 3.42E-02 | 2.40E-04 | 2.40E-04 | 2.40E-04 | 7.40E-02 |
| S6 | 9.66E-02 | 8.73E-03 | 5.27E-04 | 1.14E-01 | 6.71E-04 | 1.01E-03 | 3.64E-03 | 2.26E-01 |
| S7 | 3.11E-02 | 2.68E-03 | 2.40E-04 | 3.09E-02 | 9.11E-04 | 2.40E-04 | 9.21E-03 | 7.52E-02 |
| S8 | 7.52E-02 | 4.51E-03 | 2.40E-04 | 7.57E-02 | 2.40E-04 | 2.40E-04 | 3.84E-03 | 1.60E-01 |
| S9 | 6.94E-02 | 4.89E-03 | 2.40E-04 | 8.78E-02 | 6.23E-04 | 1.15E-03 | 6.33E-03 | 1.70E-01 |
| S10 | 9.66E-02 | 8.73E-03 | 5.27E-04 | 1.14E-01 | 6.71E-04 | 1.01E-03 | 3.64E-03 | 2.26E-01 |
| S11 | 7.07E-02 | 1.04E-02 | 1.10E-03 | 4.45E-02 | 2.68E-03 | 4.17E-03 | 5.79E-02 | 1.91E-01 |
| S12 | N.D. | 4.38E-02 | 3.93E-03 | N.D. | 5.80E-03 | 5.90E-03 | 2.68E-02 | 8.62E-02 |
| S13 | 8.91E-02 | 1.22E-02 | 2.40E-04 | 7.85E-02 | 4.94E-03 | 1.25E-03 | 5.56E-03 | 1.92E-01 |
| S14 | 3.56E-02 | 4.75E-03 | 2.40E-04 | 4.90E-02 | 2.40E-04 | 2.40E-04 | 5.27E-04 | 9.07E-02 |

**N.D**.: Not Detection

**Table S4.** The total ILCRdermal values for adults before the COVID-19 lockdown period

|  | Fe | Mn | Cu | Al | Cr | Ni | Zn | ILCRdermal |
| --- | --- | --- | --- | --- | --- | --- | --- | --- |
| S1 | 1.58E-03 | 7.21E-05 | 3.05E-06 | 2.28E-03 | 3.05E-06 | 3.91E-06 | 6.60E-06 | 3.94E-03 |
| S2 | 5.94E-04 | 3.30E-05 | 3.05E-06 | 8.06E-04 | 3.05E-06 | 1.22E-06 | 6.23E-06 | 1.45E-03 |
| S3 | 3.07E-04 | 4.03E-05 | 3.05E-06 | 4.76E-04 | 3.05E-06 | 1.22E-06 | 5.13E-06 | 8.36E-04 |
| S4 | 5.62E-05 | 3.05E-06 | 3.05E-06 | 6.60E-05 | 3.05E-06 | 3.05E-06 | 1.83E-06 | 1.36E-04 |
| S5 | 1.95E-05 | 3.05E-06 | 3.05E-06 | 2.08E-05 | 3.05E-06 | 3.05E-06 | 1.83E-06 | 5.43E-05 |
| S6 | 4.58E-04 | 6.17E-05 | 3.05E-06 | 3.98E-04 | 1.34E-05 | 4.15E-06 | 5.17E-05 | 9.90E-04 |
| S7 | 2.24E-04 | 2.50E-05 | 3.05E-06 | 2.07E-04 | 1.16E-05 | 1.22E-06 | 6.27E-05 | 5.34E-04 |
| S8 | 2.00E-04 | 5.13E-05 | 3.05E-06 | 1.75E-04 | 8.55E-06 | 3.05E-06 | 3.92E-05 | 4.81E-04 |
| S9 | 8.98E-05 | 4.64E-05 | 3.05E-06 | 7.39E-05 | 7.33E-06 | 9.53E-06 | 3.59E-05 | 1.70E-01 |
| S10 | 2.44E-04 | 9.34E-05 | 1.16E-05 | 2.69E-04 | 9.77E-06 | 7.33E-06 | 2.49E-05 | 2.26E-01 |
| S11 | 7.70E-04 | 1.51E-04 | 3.05E-06 | 5.94E-04 | 3.54E-05 | 4.74E-05 | 4.79E-04 | 1.91E-01 |
| S12 | 2.85E-03 | 2.22E-04 | 7.33E-06 | 3.30E-03 | 2.08E-05 | 1.71E-05 | 8.10E-05 | 8.62E-02 |
| S13 | 4.50E-04 | 1.22E-02 | 2.40E-04 | 7.85E-02 | 4.94E-03 | 1.25E-03 | 5.56E-03 | 1.92E-01 |
| S14 | 2.86E-04 | 4.75E-03 | 2.40E-04 | 4.90E-02 | 2.40E-04 | 2.40E-04 | 5.27E-04 | 9.07E-02 |

**Table S5.** The total ILCRdermal values for adults during the COVID-19 lockdown period

|  | Fe | Mn | Cu | Al | Cr | Ni | Zn | ILCRdermal |
| --- | --- | --- | --- | --- | --- | --- | --- | --- |
| S1 | 5.31E-05 | 1.22E-05 | 3.05E-06 | 6.66E-05 | 3.05E-06 | 1.22E-06 | 1.83E-06 | 1.41E-04 |
| S2 | 1.08E-04 | 4.09E-05 | 3.05E-06 | 1.39E-04 | 3.05E-06 | 1.22E-06 | 1.83E-06 | 2.97E-04 |
| S3 | 3.07E-04 | 4.03E-05 | 3.05E-06 | 4.76E-04 | 3.05E-06 | 1.22E-06 | 5.13E-06 | 8.36E-04 |
| S4 | 3.83E-04 | 1.77E-05 | 3.05E-06 | 4.48E-04 | 3.05E-06 | 1.22E-06 | 1.83E-06 | 8.59E-04 |
| S5 | 4.78E-04 | 1.71E-05 | 3.05E-06 | 4.36E-04 | 3.05E-06 | 1.22E-06 | 1.83E-06 | 9.40E-04 |
| S6 | 1.23E-03 | 1.11E-04 | 6.72E-06 | 1.46E-03 | 8.55E-06 | 5.13E-06 | 2.78E-05 | 2.85E-03 |
| S7 | 3.96E-04 | 3.42E-05 | 3.05E-06 | 3.93E-04 | 1.16E-05 | 1.22E-06 | 7.03E-05 | 9.09E-04 |
| S8 | 9.58E-04 | 5.74E-05 | 3.05E-06 | 9.64E-04 | 3.05E-06 | 1.22E-06 | 2.93E-05 | 2.02E-03 |
| S9 | 8.84E-04 | 6.23E-05 | 3.05E-06 | 1.12E-03 | 7.94E-06 | 5.86E-06 | 4.84E-05 | 2.13E-03 |
| S10 | 1.23E-03 | 1.11E-04 | 6.72E-06 | 1.46E-03 | 8.55E-06 | 5.13E-06 | 2.78E-05 | 2.85E-03 |
| S11 | 9.00E-04 | 1.33E-04 | 1.40E-05 | 5.67E-04 | 3.42E-05 | 2.13E-05 | 4.42E-04 | 2.11E-03 |
| S12 | N.D. | 5.58E-04 | 5.01E-05 | N.D. | 7.39E-05 | 3.00E-05 | 2.04E-04 | 9.17E-04 |
| S13 | 1.14E-03 | 1.55E-04 | 3.05E-06 | 1.00E-03 | 6.29E-05 | 6.35E-06 | 4.25E-05 | 2.40E-03 |
| S14 | 4.54E-04 | 6.05E-05 | 3.05E-06 | 6.24E-04 | 3.05E-06 | 1.22E-06 | 4.03E-06 | 1.15E-03 |

**N.D**.: Not Detection

**Table S6.** The total ILCRingestion values for children before the COVID-19 lockdown

|  | Fe | Mn | Cu | Al | Cr | Ni | Zn | ILCRingestion |
| --- | --- | --- | --- | --- | --- | --- | --- | --- |
| S1 | 1.02E-02 | 4.66E-04 | 1.98E-05 | 1.47E-02 | 1.98E-05 | 6.32E-05 | 7.12E-05 | 2.56E-02 |
| S2 | 3.84E-03 | 2.13E-04 | 1.98E-05 | 5.22E-03 | 1.98E-05 | 1.98E-05 | 6.72E-05 | 9.40E-03 |
| S3 | 1.98E-03 | 2.61E-04 | 1.98E-05 | 3.08E-03 | 1.98E-05 | 1.98E-05 | 5.53E-05 | 5.44E-03 |
| S4 | 3.64E-04 | 1.98E-05 | 1.98E-05 | 4.27E-04 | 1.98E-05 | 4.94E-05 | 1.98E-05 | 9.19E-04 |
| S5 | 1.26E-04 | 1.98E-05 | 1.98E-05 | 1.34E-04 | 1.98E-05 | 4.94E-05 | 1.98E-05 | 3.89E-04 |
| S6 | 2.96E-03 | 3.99E-04 | 1.98E-05 | 2.58E-03 | 8.70E-05 | 6.72E-05 | 5.57E-04 | 6.67E-03 |
| S7 | 1.45E-03 | 1.62E-04 | 1.98E-05 | 1.34E-03 | 7.51E-05 | 1.98E-05 | 6.76E-04 | 3.74E-03 |
| S8 | 1.30E-03 | 3.32E-04 | 1.98E-05 | 1.13E-03 | 5.53E-05 | 4.94E-05 | 4.23E-04 | 3.31E-03 |
| S9 | 5.81E-04 | 3.00E-04 | 1.98E-05 | 4.78E-04 | 4.74E-05 | 1.54E-04 | 3.87E-04 | 1.97E-03 |
| S10 | 1.58E-03 | 6.05E-04 | 7.51E-05 | 1.74E-03 | 6.32E-05 | 1.19E-04 | 2.69E-04 | 4.45E-03 |
| S11 | 4.98E-03 | 9.76E-04 | 1.98E-05 | 3.84E-03 | 2.29E-04 | 7.67E-04 | 5.17E-03 | 1.60E-02 |
| S12 | 1.85E-02 | 1.43E-03 | 4.74E-05 | 2.14E-02 | 1.34E-04 | 2.77E-04 | 8.74E-04 | 4.26E-02 |
| S13 | 2.91E-03 | 9.49E-04 | 1.98E-05 | 3.00E-03 | 4.59E-04 | 8.30E-05 | 1.34E-04 | 7.56E-03 |
| S14 | 1.85E-03 | 4.35E-04 | 1.98E-05 | 2.81E-03 | 1.98E-05 | 7.12E-05 | 4.74E-05 | 5.26E-03 |

**Table S7.** The total ILCRingestion values for children during the COVID-19 lockdown period

|  | Fe | Mn | Cu | Al | Cr | Ni | Zn | ILCRingestion |
| --- | --- | --- | --- | --- | --- | --- | --- | --- |
| S1 | 3.44E-04 | 7.91E-05 | 1.98E-05 | 4.31E-04 | 1.98E-05 | 1.98E-05 | 1.98E-05 | 9.33E-04 |
| S2 | 7.00E-04 | 2.65E-04 | 1.98E-05 | 8.97E-04 | 1.98E-05 | 1.98E-05 | 1.98E-05 | 1.94E-03 |
| S3 | 1.98E-03 | 2.61E-04 | 1.98E-05 | 3.08E-03 | 1.98E-05 | 1.98E-05 | 5.53E-05 | 5.44E-03 |
| S4 | 2.48E-03 | 1.15E-04 | 1.98E-05 | 2.90E-03 | 1.98E-05 | 1.98E-05 | 1.98E-05 | 5.58E-03 |
| S5 | 3.09E-03 | 1.11E-04 | 1.98E-05 | 2.82E-03 | 1.98E-05 | 1.98E-05 | 1.98E-05 | 6.10E-03 |
| S6 | 7.97E-03 | 7.19E-04 | 4.35E-05 | 9.43E-03 | 5.53E-05 | 8.30E-05 | 3.00E-04 | 1.86E-02 |
| S7 | 2.56E-03 | 2.21E-04 | 1.98E-05 | 2.55E-03 | 7.51E-05 | 1.98E-05 | 7.59E-04 | 6.20E-03 |
| S8 | 6.20E-03 | 3.72E-04 | 1.98E-05 | 6.24E-03 | 1.98E-05 | 1.98E-05 | 3.16E-04 | 1.32E-02 |
| S9 | 5.72E-03 | 4.03E-04 | 1.98E-05 | 7.24E-03 | 5.14E-05 | 9.49E-05 | 5.22E-04 | 1.41E-02 |
| S10 | 7.97E-03 | 7.19E-04 | 4.35E-05 | 9.43E-03 | 5.53E-05 | 8.30E-05 | 3.00E-04 | 1.86E-02 |
| S11 | 5.83E-03 | 8.58E-04 | 9.09E-05 | 3.67E-03 | 2.21E-04 | 3.44E-04 | 4.77E-03 | 1.58E-02 |
| S12 | N.D. | 3.61E-03 | 3.24E-04 | N.D. | 4.78E-04 | 4.86E-04 | 2.21E-03 | 7.11E-03 |
| S13 | 7.35E-03 | 1.00E-03 | 1.98E-05 | 6.47E-03 | 4.07E-04 | 1.03E-04 | 4.59E-04 | 1.58E-02 |
| S14 | 2.94E-03 | 3.91E-04 | 1.98E-05 | 4.04E-03 | 1.98E-05 | 1.98E-05 | 4.35E-05 | 7.48E-03 |

**N.D**.: Not Detection

**Table S8.** The total ILCRdermal values for children before the COVID-19 lockdown period

|  | Fe | Mn | Cu | Al | Cr | Ni | Zn | ILCRdermal |
| --- | --- | --- | --- | --- | --- | --- | --- | --- |
| S1 | 1.49E-04 | 6.81E-06 | 2.88E-07 | 2.15E-04 | 2.88E-07 | 3.69E-07 | 6.23E-07 | 3.72E-04 |
| S2 | 5.61E-05 | 3.12E-06 | 2.88E-07 | 7.62E-05 | 2.88E-07 | 1.15E-07 | 5.88E-07 | 1.37E-04 |
| S3 | 2.90E-05 | 3.81E-06 | 2.88E-07 | 4.50E-05 | 2.88E-07 | 1.15E-07 | 4.85E-07 | 7.89E-05 |
| S4 | 5.31E-06 | 2.88E-07 | 2.88E-07 | 6.23E-06 | 2.88E-07 | 2.88E-07 | 1.73E-07 | 1.29E-05 |
| S5 | 1.85E-06 | 2.88E-07 | 2.88E-07 | 1.96E-06 | 2.88E-07 | 2.88E-07 | 1.73E-07 | 5.13E-06 |
| S6 | 4.33E-05 | 5.83E-06 | 2.88E-07 | 3.76E-05 | 1.27E-06 | 3.92E-07 | 4.88E-06 | 9.35E-05 |
| S7 | 2.11E-05 | 2.37E-06 | 2.88E-07 | 1.96E-05 | 1.10E-06 | 1.15E-07 | 5.92E-06 | 5.05E-05 |
| S8 | 1.89E-05 | 4.85E-06 | 2.88E-07 | 1.66E-05 | 8.08E-07 | 2.88E-07 | 3.70E-06 | 4.54E-05 |
| S9 | 8.48E-06 | 4.38E-06 | 2.88E-07 | 6.98E-06 | 6.92E-07 | 9.00E-07 | 3.39E-06 | 2.51E-05 |
| S10 | 2.30E-05 | 8.83E-06 | 1.10E-06 | 2.54E-05 | 9.23E-07 | 6.92E-07 | 2.35E-06 | 6.23E-05 |
| S11 | 7.27E-05 | 1.42E-05 | 2.88E-07 | 5.61E-05 | 3.35E-06 | 4.48E-06 | 4.53E-05 | 1.96E-04 |
| S12 | 2.70E-04 | 2.09E-05 | 6.92E-07 | 3.12E-04 | 1.96E-06 | 1.62E-06 | 7.65E-06 | 6.15E-04 |
| S13 | 4.25E-05 | 1.38E-05 | 2.88E-07 | 4.38E-05 | 6.69E-06 | 4.85E-07 | 1.18E-06 | 1.09E-04 |
| S14 | 2.71E-05 | 6.35E-06 | 2.88E-07 | 4.11E-05 | 2.88E-07 | 4.15E-07 | 4.15E-07 | 7.59E-05 |

**Table S9.** The total ILCRdermal values for children during the COVID-19 lockdown period

|  | Fe | Mn | Cu | Al | Cr | Ni | Zn | ILCRdermal |
| --- | --- | --- | --- | --- | --- | --- | --- | --- |
| S1 | 5.02E-06 | 1.15E-06 | 2.88E-07 | 6.29E-06 | 2.88E-07 | 1.15E-07 | 1.73E-07 | 1.33E-05 |
| S2 | 1.02E-05 | 3.87E-06 | 2.88E-07 | 1.31E-05 | 2.88E-07 | 1.15E-07 | 1.73E-07 | 2.80E-05 |
| S3 | 2.90E-05 | 3.81E-06 | 2.88E-07 | 4.50E-05 | 2.88E-07 | 1.15E-07 | 4.85E-07 | 7.89E-05 |
| S4 | 3.62E-05 | 1.67E-06 | 2.88E-07 | 4.23E-05 | 2.88E-07 | 1.15E-07 | 1.73E-07 | 8.11E-05 |
| S5 | 4.51E-05 | 1.62E-06 | 2.88E-07 | 4.12E-05 | 2.88E-07 | 1.15E-07 | 1.73E-07 | 8.88E-05 |
| S6 | 1.16E-04 | 1.05E-05 | 6.35E-07 | 1.38E-04 | 8.08E-07 | 4.85E-07 | 2.63E-06 | 2.69E-04 |
| S7 | 3.74E-05 | 3.23E-06 | 2.88E-07 | 3.72E-05 | 1.10E-06 | 1.15E-07 | 6.65E-06 | 8.59E-05 |
| S8 | 9.05E-05 | 5.42E-06 | 2.88E-07 | 9.10E-05 | 2.88E-07 | 1.15E-07 | 2.77E-06 | 1.90E-04 |
| S9 | 8.35E-05 | 5.88E-06 | 2.88E-07 | 1.06E-04 | 7.50E-07 | 5.54E-07 | 4.57E-06 | 2.01E-04 |
| S10 | 1.16E-04 | 1.05E-05 | 6.35E-07 | 1.38E-04 | 8.08E-07 | 4.85E-07 | 2.63E-06 | 2.69E-04 |
| S11 | 8.50E-05 | 1.25E-05 | 1.33E-06 | 5.35E-05 | 3.23E-06 | 2.01E-06 | 4.18E-05 | 1.99E-04 |
| S12 | N.D. | 5.27E-05 | 4.73E-06 | N.D. | 6.98E-06 | 2.84E-06 | 1.93E-05 | 8.66E-05 |
| S13 | 1.07E-04 | 1.47E-05 | 2.88E-07 | 9.44E-05 | 5.94E-06 | 6.00E-07 | 4.02E-06 | 2.27E-04 |
| S14 | 4.29E-05 | 5.71E-06 | 2.88E-07 | 5.90E-05 | 2.88E-07 | 1.15E-07 | 3.81E-07 | 1.09E-04 |

**N.D**.: Not Detection

**Table S10.** The total HI values for adults before the COVID-19 lockdown period

|  | Fe | Mn | Cu | Al | Cr | Ni | Zn | Total HI |
| --- | --- | --- | --- | --- | --- | --- | --- | --- |
| S1 | 1.04E+00 | 8.70E-01 | 1.49E-02 | 4.44E-01 | 6.61E-01 | 9.12E-02 | 6.97E-03 | 3.13E+00 |
| S2 | 3.93E-01 | 3.98E-01 | 1.49E-02 | 1.57E-01 | 6.61E-01 | 2.85E-02 | 6.58E-03 | 1.66E+00 |
| S3 | 2.03E-01 | 4.87E-01 | 1.49E-02 | 9.28E-02 | 6.61E-01 | 2.85E-02 | 5.42E-03 | 1.49E+00 |
| S4 | 3.72E-02 | 3.69E-02 | 1.49E-02 | 1.29E-02 | 6.61E-01 | 7.12E-02 | 1.94E-03 | 8.36E-01 |
| S5 | 1.29E-02 | 3.69E-02 | 1.49E-02 | 4.05E-03 | 6.61E-01 | 7.12E-02 | 1.94E-03 | 8.03E-01 |
| S6 | 3.03E-01 | 7.45E-01 | 1.49E-02 | 7.76E-02 | 2.91E+00 | 9.69E-02 | 5.46E-02 | 4.20E+00 |
| S7 | 1.48E-01 | 3.02E-01 | 1.49E-02 | 4.03E-02 | 2.51E+00 | 2.85E-02 | 6.62E-02 | 3.11E+00 |
| S8 | 1.33E-01 | 6.19E-01 | 1.49E-02 | 3.42E-02 | 1.85E+00 | 7.12E-02 | 4.14E-02 | 2.76E+00 |
| S9 | 5.95E-02 | 5.60E-01 | 1.49E-02 | 1.44E-02 | 1.59E+00 | 2.22E-01 | 3.79E-02 | 2.50E+00 |
| S10 | 1.61E-01 | 1.13E+00 | 5.65E-02 | 5.24E-02 | 2.12E+00 | 1.71E-01 | 2.63E-02 | 3.72E+00 |
| S11 | 5.10E-01 | 1.82E+00 | 1.49E-02 | 1.16E-01 | 7.67E+00 | 1.11E+00 | 5.06E-01 | 1.17E+01 |
| S12 | 1.89E+00 | 2.68E+00 | 3.57E-02 | 6.44E-01 | 4.50E+00 | 3.99E-01 | 8.56E-02 | 1.02E+01 |
| S13 | 2.98E-01 | 1.77E+00 | 1.49E-02 | 9.03E-02 | 1.53E+01 | 1.20E-01 | 1.32E-02 | 1.76E+01 |
| S14 | 1.90E-01 | 8.11E-01 | 1.49E-02 | 8.47E-02 | 6.61E-01 | 1.03E-01 | 4.65E-03 | 1.87E+00 |

**Table S11.** The total HI values for adults during the COVID-19 lockdown period

|  | Fe | Mn | Cu | Al | Cr | Ni | Zn | Total HI |
| --- | --- | --- | --- | --- | --- | --- | --- | --- |
| S1 | 3.52E-02 | 1.47E-01 | 1.49E-02 | 1.30E-02 | 6.61E-01 | 2.85E-02 | 1.94E-03 | 9.02E-01 |
| S2 | 7.16E-02 | 4.94E-01 | 1.49E-02 | 2.70E-02 | 6.61E-01 | 2.85E-02 | 1.94E-03 | 1.30E+00 |
| S3 | 2.93E-01 | 6.71E-01 | 1.49E-02 | 8.12E-02 | 6.61E-01 | 2.85E-02 | 1.01E-02 | 1.76E+00 |
| S4 | 2.44E-01 | 1.70E-01 | 1.49E-02 | 1.16E-01 | 6.61E-01 | 7.12E-02 | 1.94E-03 | 1.28E+00 |
| S5 | 1.50E-02 | 3.69E-02 | 1.49E-02 | 4.05E-03 | 6.61E-01 | 7.12E-02 | 1.94E-03 | 8.05E-01 |
| S6 | 9.39E-02 | 4.35E-01 | 1.49E-02 | 1.80E-02 | 6.61E-01 | 7.12E-02 | 2.40E-02 | 1.32E+00 |
| S7 | 1.25E-01 | 1.77E-01 | 1.49E-02 | 2.65E-02 | 6.61E-01 | 2.85E-02 | 2.56E-02 | 1.06E+00 |
| S8 | 1.08E-01 | 3.69E-01 | 1.49E-02 | 1.99E-02 | 6.61E-01 | 7.12E-02 | 2.21E-02 | 1.27E+00 |
| S9 | 1.38E-01 | 4.42E-01 | 3.27E-02 | 5.94E-02 | 6.61E-01 | 1.31E-01 | 6.08E-02 | 1.52E+00 |
| S10 | 1.57E+00 | 1.40E+00 | 5.95E-02 | 5.03E-01 | 4.23E+00 | 2.34E-01 | 6.47E-02 | 8.06E+00 |
| S11 | 2.23E-01 | 1.11E+00 | 1.49E-02 | 6.53E-02 | 2.25E+00 | 6.84E-01 | 1.99E-01 | 4.55E+00 |
| S12 | N.D. | 1.54E+00 | 6.54E-02 | N.D. | 4.37E+00 | 3.42E-01 | 1.12E-01 | 8.70E+00 |
| S13 | 7.05E-01 | 8.92E-01 | 2.38E-02 | 2.49E-01 | 6.09E+00 | 1.27E-01 | 3.91E-02 | 8.13E+00 |
| S14 | 8.07E-01 | 1.12E+00 | 1.49E-02 | 3.43E-01 | 6.61E-01 | 2.85E-02 | 6.97E-03 | 2.98E+00 |

**N.D**.: Not Detection

**Table S12.** The total HI values for children before the COVID-19 lockdown period

|  | Fe | Mn | Cu | Al | Cr | Ni | Zn | Total HI |
| --- | --- | --- | --- | --- | --- | --- | --- | --- |
| S1 | 4.34E-01 | 3.71E-01 | 6.17E-03 | 1.84E-01 | 3.01E-01 | 3.76E-02 | 2.88E-03 | 1.34E+00 |
| S2 | 1.64E-01 | 1.70E-01 | 6.17E-03 | 6.52E-02 | 3.01E-01 | 1.18E-02 | 2.72E-03 | 7.21E-01 |
| S3 | 8.45E-02 | 2.07E-01 | 6.17E-03 | 3.85E-02 | 3.01E-01 | 1.18E-02 | 2.24E-03 | 6.51E-01 |
| S4 | 1.55E-02 | 1.57E-02 | 6.17E-03 | 5.33E-03 | 3.01E-01 | 2.94E-02 | 8.01E-04 | 3.74E-01 |
| S5 | 5.39E-03 | 1.57E-02 | 6.17E-03 | 1.68E-03 | 3.01E-01 | 2.94E-02 | 8.01E-04 | 3.60E-01 |
| S6 | 1.26E-01 | 3.17E-01 | 6.17E-03 | 3.22E-02 | 1.32E+00 | 4.00E-02 | 2.26E-02 | 1.86E+00 |
| S7 | 6.16E-02 | 1.29E-01 | 6.17E-03 | 1.67E-02 | 1.14E+00 | 1.18E-02 | 2.74E-02 | 1.39E+00 |
| S8 | 5.52E-02 | 2.64E-01 | 6.17E-03 | 1.42E-02 | 8.42E-01 | 2.94E-02 | 1.71E-02 | 1.23E+00 |
| S9 | 2.47E-02 | 2.39E-01 | 6.17E-03 | 5.98E-03 | 7.21E-01 | 9.17E-02 | 1.57E-02 | 1.10E+00 |
| S10 | 6.72E-02 | 4.81E-01 | 2.35E-02 | 2.17E-02 | 9.62E-01 | 7.05E-02 | 1.09E-02 | 1.64E+00 |
| S11 | 2.12E-01 | 7.76E-01 | 6.17E-03 | 4.80E-02 | 3.49E+00 | 4.56E-01 | 2.09E-01 | 5.20E+00 |
| S12 | 7.87E-01 | 1.14E+00 | 1.48E-02 | 2.67E-01 | 2.04E+00 | 1.65E-01 | 3.54E-02 | 4.45E+00 |
| S13 | 1.24E-01 | 7.54E-01 | 6.17E-03 | 3.75E-02 | 6.97E+00 | 4.94E-02 | 5.44E-03 | 7.95E+00 |
| S14 | 7.90E-02 | 3.46E-01 | 6.17E-03 | 3.52E-02 | 3.01E-01 | 4.23E-02 | 1.92E-03 | 8.12E-01 |

**Table S13.** The total HI values for children during the COVID-19 lockdown period

|  | Fe | Mn | Cu | Al | Cr | Ni | Zn | Total HI |
| --- | --- | --- | --- | --- | --- | --- | --- | --- |
| S1 | 1.46E-02 | 6.28E-02 | 6.17E-03 | 5.38E-03 | 3.01E-01 | 1.18E-02 | 8.01E-04 | 4.03E-01 |
| S2 | 2.98E-02 | 2.10E-01 | 6.17E-03 | 1.12E-02 | 3.01E-01 | 1.18E-02 | 8.01E-04 | 5.71E-01 |
| S3 | 1.22E-01 | 2.86E-01 | 6.17E-03 | 3.37E-02 | 3.01E-01 | 1.18E-02 | 4.16E-03 | 7.65E-01 |
| S4 | 1.02E-01 | 7.22E-02 | 6.17E-03 | 4.80E-02 | 3.01E-01 | 2.94E-02 | 8.01E-04 | 5.60E-01 |
| S5 | 6.23E-03 | 1.57E-02 | 6.17E-03 | 1.68E-03 | 3.01E-01 | 2.94E-02 | 8.01E-04 | 3.61E-01 |
| S6 | 3.91E-02 | 1.85E-01 | 6.17E-03 | 7.46E-03 | 3.01E-01 | 2.94E-02 | 9.93E-03 | 5.78E-01 |
| S7 | 5.19E-02 | 7.54E-02 | 6.17E-03 | 1.10E-02 | 3.01E-01 | 1.18E-02 | 1.06E-02 | 4.68E-01 |
| S8 | 4.51E-02 | 1.57E-01 | 6.17E-03 | 8.25E-03 | 3.01E-01 | 2.94E-02 | 9.13E-03 | 5.56E-01 |
| S9 | 5.72E-02 | 1.88E-01 | 1.36E-02 | 2.46E-02 | 3.01E-01 | 5.41E-02 | 2.51E-02 | 6.64E-01 |
| S10 | 6.55E-01 | 5.97E-01 | 2.47E-02 | 2.09E-01 | 1.92E+00 | 9.64E-02 | 2.67E-02 | 3.53E+00 |
| S11 | 9.26E-02 | 4.74E-01 | 6.17E-03 | 2.71E-02 | 1.02E+00 | 2.82E-01 | 8.23E-02 | 1.98E+00 |
| S12 | N.D. | 6.56E-01 | 2.72E-02 | N.D. | 1.98E+00 | 1.41E-01 | 4.64E-02 | 2.85E+00 |
| S13 | 2.93E-01 | 3.80E-01 | 9.88E-03 | 1.03E-01 | 2.77E+00 | 5.23E-02 | 1.62E-02 | 3.62E+00 |
| S14 | 3.36E-01 | 4.77E-01 | 6.17E-03 | 1.42E-01 | 3.01E-01 | 1.18E-02 | 2.88E-03 | 1.28E+00 |

**N.D**.: Not Detection

**References**

Kumar, M., Nagdev, R., Tripathi, R., Singh, V.B., Ranjan, P., Soheb, M., Ramanathan, A.L., 2019. Geospatial and multivariate analysis of trace metals in tubewell water using for drinking purpose in the upper Gangetic basin, India: Heavy metal pollution index. Groundw. Sustain. Dev. 8, 122–133. https://doi.org/10.1016/j.gsd.2018.10.001

Rezaei, A., Hassani, H., Hassani, S., Jabbari, N., Fard Mousavi, S.B., Rezaei, S., 2019. Evaluation of groundwater quality and heavy metal pollution indices in Bazman basin, southeastern Iran. Groundw. Sustain. Dev. 9, 100245. https://doi.org/10.1016/j.gsd.2019.100245

Ustaoğlu, F., Aydın, H., 2020. Health risk assessment of dissolved heavy metals in surface water in a subtropical rivers basin system of Giresun (North-eastern Turkey). Desalin. Water Treat. 194, 222–234. https://doi.org/10.5004/dwt.2020.25900
